# Supplementary material for: The Semantics of Natural Objects and Tools in the Brain: A Combined Behavioral and MEG Study
Source: MDPI journal article supplement (doi:10.3390/brainsci12010097), 2022-01-12
Supplement: s1 [file s1]

Supplementary Material - Stimuli used in Experiment 1 and 2

| nouns       | translation        | images                 | category |
|-------------|--------------------|------------------------|----------|
| Bottiglia   | bottle             | axe                    | tool     |
| Bottone     | button             | needle                 | tool     |
| Chiave      | key                | stick                  | tool     |
| Coltello    | knife              | pen                    | tool     |
| Cucchiaio   | spoon              | ball for bocce game    | tool     |
| Forbici     | scissors           | match                  | tool     |
| Forchetta   | fork               | cudgel                 | tool     |
| Maniglia    | handle             | iron                   | tool     |
| Ombrello    | umbrella           | hairpin                | tool     |
| Martello    | hammer             | handbrake              | tool     |
| Pettine     | comb               | knob                   | tool     |
| Pinza       | plier              | crank (coffee grinder) | tool     |
| Rasoio      | razor              | mace                   | tool     |
| Rubinetto   | tap water          | clothespin             | tool     |
| Sapone      | soap (bar of soap) | sea shovel             | tool     |
| Scopa       | broom              | table tennis racket    | tool     |
| Tappo       | stopper            | spatula                | tool     |
| Telecomando | remote control     | brush                  | tool     |
| Telefono    | phone              | sponge                 | tool     |
| Zip         | zip                | folding fan            | tool     |
| Bulbo       | flower bulb        | banana peel            | natural  |
| Pigna       | pine cone          | coal                   | natural  |
| Bocciolo    | bud                | sea shell              | natural  |
| Corteccia   | bark               | coral                  | natural  |
| Foglia      | leaf               | diamond                | natural  |
| Fossile     | fossil             | flower                 | natural  |
| Cuoio       | leather            | piece of clay          | natural  |
| Granello    | granule            | acorn                  | natural  |
| Neve        | snow               | bone                   | natural  |
| Paglia      | straw              | pearl                  | natural  |
| Pepita      | nugget             | petal                  | natural  |
| Picciolo    | petiole            | bean pod               | natural  |
| Pietra      | stone              | feather                | natural  |
| Ramoscello  | twig               | root                   | natural  |
| Guscio      | shell              | stone                  | natural  |
| Sabbia      | sand               | ear of corn            | natural  |
| Scorza      | zest               | icicle                 | natural  |
| Seme        | seed               | timber                 | natural  |
| Stelo       | stem               | musk                   | natural  |
| Sughero     | cork               | hairs                  | natural  |
